# Supplementary material for: Oxocomplexes of Mo(vi) and W(vi) with 8-hydroxyquinoline-5-sulfonate in solution: structural studies and the effect of the metal ion on the photophysical behaviour
Source: Royal Society of Chemistry journal article supplement (doi:10.1039/c5dt03473f), 2015-01-01
Supplement: c5dt03473f1.pdf [file c5dt03473f1.pdf]

**Electronic supplementary information (ESI)**

**Oxocomplexes of Mo(VI) and W(VI) with 8-Hydroxyquinoline-5-Sulfonate in Solution: Structural Studies and the Effect of the Metal Ion on the Photophysical Behaviour**

M. Luísa Ramos,\* Lícia L. G. Justino, Paulo E. Abreu, Sofia M. Fonseca, Hugh D. Burrows

*Centro de Química and Department of Chemistry, University of Coimbra, 3004-535 Coimbra, Portugal. Email: [mlramos@ci.uc.pt](mailto:mlramos@ci.uc.pt); Fax: +351+239827703; Tel. +351+239854453*

**Table S1.**  $^1\text{H}$  NMR parameters <sup>a</sup> for 8-HQS and its complexes with Mo(VI) and W(VI) (298 K)

|                                         | H-2   | H-3   | H-4   | H-6   | H-7   | $J_{2,3}$      | $J_{3,4}$      | $J_{2,4}$      | $J_{6,7}$ |
|-----------------------------------------|-------|-------|-------|-------|-------|----------------|----------------|----------------|-----------|
| <b>8-HQS</b> <sup>b</sup>               |       |       |       |       |       |                |                |                |           |
| pH*=2.1                                 | 9.17  | 8.28  | 9.74  | 8.36  | 7.53  | 5.0            | 8.6            | 1.2            | 8.3       |
| pH*=3.0                                 | 9.14  | 8.21  | 9.65  | 8.33  | 7.49  | 5.0            | 8.6            | 1.2            | 8.3       |
| pH*=4.0                                 | 9.00  | 7.98  | 9.32  | 8.21  | 7.33  | 5.4            | 8.8            | 1.2            | 8.2       |
| pH*=5.0                                 | 8.96  | 7.85  | 9.15  | 8.16  | 7.27  | 4.4            | 8.8            | 1.2            | 8.2       |
| pH*=6.5                                 | 8.95  | 7.81  | 9.09  | 8.14  | 7.25  | 4.2            | 8.7            | 1.0            | 8.2       |
| pH*=7.0                                 | 8.95  | 7.81  | 9.08  | 8.13  | 7.24  | 4.2            | 8.7            | 1.0            | 8.2       |
| <b>Mo(VI)/8-HQS</b>                     |       |       |       |       |       |                |                |                |           |
| complex <b>a</b> <sup>c</sup> (pH* 3.8) |       |       |       |       |       |                |                |                |           |
| $\delta$                                | 9.15  | 7.92  | 9.16  | 8.15  | 7.03  | 4.8            | 8.6            | -              | 8.3       |
| $\Delta\delta$                          | 0.15  | -0.06 | -0.16 | -0.06 | -0.30 |                |                |                |           |
| complex <b>b</b> <sup>c</sup> (pH* 3.8) |       |       |       |       |       |                |                |                |           |
| $\delta$                                | 8.74  | 7.66  | 9.04  | 8.28  | 7.47  | 4.9            | 8.7            | 1.3            | 8.3       |
| $\Delta\delta$                          | -0.26 | -0.32 | -0.28 | 0.07  | 0.14  |                |                |                |           |
| complex <b>c</b> <sup>d</sup> (pH* 5.3) |       |       |       |       |       |                |                |                |           |
| $\delta$                                | 9.18  | 7.94  | 9.18  | 8.18  | 7.05  | 4.3            | 6.7            | - <sup>e</sup> | 8.3       |
| $\Delta\delta$                          | 0.22  | 0.09  | 0.03  | 0.02  | -0.22 |                |                |                |           |
| <b>W(VI)/8-HQS</b>                      |       |       |       |       |       |                |                |                |           |
| complex <b>a</b> <sup>f</sup> (pH* 4.6) |       |       |       |       |       |                |                |                |           |
| $\delta$                                | 9.06  | 8.05  | 9.43  | 8.25  | 7.39  | 5.0            | 8.8            | - <sup>e</sup> | 8.2       |
| $\Delta\delta$                          | 0.10  | 0.20  | 0.28  | 0.09  | 0.12  |                |                |                |           |
| complex <b>b</b> <sup>f</sup> (pH* 4.6) |       |       |       |       |       |                |                |                |           |
| $\delta$                                | 8.83  | 7.75  | 9.13  | 8.37  | 7.58  | 4.9            | 8.7            | 1.2            | 8.2       |
| $\Delta\delta$                          | -0.13 | -0.10 | -0.02 | 0.21  | 0.31  |                |                |                |           |
| complex <b>c</b> <sup>g</sup> (pH* 7.0) |       |       |       |       |       |                |                |                |           |
| $\delta$                                | 9.24  | 8.00  | 9.24  | 8.25  | 7.10  | - <sup>e</sup> | - <sup>e</sup> | - <sup>e</sup> | 8.3       |
| $\Delta\delta$                          | 0.29  | 0.19  | 0.16  | 0.12  | -0.14 |                |                |                |           |

<sup>a</sup>  $\delta$  values, in ppm, relative to  $\text{Me}_4\text{Si}$ , using *tert*-butyl alcohol ( $\delta_{\text{H}}=1.3$ ) as internal reference;  $J$  values in Hz.

<sup>b</sup> 10 mmol  $\text{dm}^{-3}$  8-HQS solution.

<sup>c</sup> 5:10 mmol  $\text{dm}^{-3}$  Mo(VI)–8-HQS solution.

<sup>d</sup> 10:10 mmol  $\text{dm}^{-3}$  Mo(VI)–8-HQS solution.

<sup>e</sup> not observed due to the broadness of the signals.

<sup>f</sup> 10:10 mmol  $\text{dm}^{-3}$  W(VI)–8-HQS solution.

<sup>g</sup> 5.0:10 mmol  $\text{dm}^{-3}$  W(VI)–8-HQS solution.

Table S2.  $^{13}\text{C}$  NMR parameters  $^a$  for 8-HQS and its complexes with Mo(VI) and W(VI) (298 K)

|                                 | C-2    | C-3    | C-4    | C-5    | C-6    | C-7    | C-8    | C-9    | C-10   |
|---------------------------------|--------|--------|--------|--------|--------|--------|--------|--------|--------|
| <b>8-HQS</b> $^b$               |        |        |        |        |        |        |        |        |        |
| pH*=2.1                         | 146.17 | 124.17 | 144.77 | 131.58 | 132.34 | 115.74 | 151.56 | 131.39 | 127.66 |
| pH*=3.1                         | 146.23 | 124.82 | 143.63 | 133.59 | 131.68 | 114.64 | 153.26 | 131.29 | 127.48 |
| pH*=4.0                         | 148.09 | 124.75 | 140.34 | 136.33 | 130.81 | 113.22 | 154.91 | 130.91 | 127.07 |
| pH*=5.0                         | 149.59 | 124.71 | 137.78 | 138.60 | 130.16 | 112.14 | 156.29 | 130.49 | 126.84 |
| pH*=6.5                         | 150.19 | 124.71 | 136.79 | 139.54 | 129.81 | 111.73 | 156.91 | 130.35 | 126.78 |
| pH*=7.0                         | 150.12 | 124.67 | 136.69 | 139.59 | 129.91 | 111.72 | 157.14 | 130.04 | 126.75 |
| <b>Mo(VI)/8-HQS</b>             |        |        |        |        |        |        |        |        |        |
| complex <b>a</b> $^c$ (pH* 3.8) |        |        |        |        |        |        |        |        |        |
| $\delta$                        | 151.08 | 125.26 | 139.26 | 142.02 | 131.88 | 112.37 | 162.59 | 127.08 | 125.92 |
| $\Delta\delta$                  | 2.99   | 0.51   | -1.08  | 5.69   | 1.07   | -0.85  | 7.68   | -3.83  | -1.15  |
| complex <b>b</b> $^c$ (pH*3.8)  |        |        |        |        |        |        |        |        |        |
| $\delta$                        | 149.64 | 124.77 | 139.63 | 141.28 | 131.13 | 114.29 | 164.27 | 126.70 | 125.92 |
| $\Delta\delta$                  | 1.55   | 0.02   | -0.71  | 4.95   | 0.32   | 1.07   | 9.36   | -4.21  | -1.15  |
| complex <b>c</b> $^d$ (pH* 5.3) |        |        |        |        |        |        |        |        |        |
| $\delta$                        | 151.07 | 125.26 | 139.18 | 142.04 | 131.92 | 112.32 | 164.40 | 127.10 | 126.48 |
| $\Delta\delta$                  | 1.48   | 0.55   | 1.40   | 3.44   | 1.76   | 0.18   | 8.11   | -3.39  | -0.36  |
| <b>W(VI)/8-HQS</b>              |        |        |        |        |        |        |        |        |        |
| complex <b>a</b> $^e$ (pH* 4.6) |        |        |        |        |        |        |        |        |        |
| $\delta$                        | 151.47 | 125.54 | 139.84 | 142.46 | 132.09 | 113.82 | 162.88 | 131.30 | 127.45 |
| $\Delta\delta$                  | 1.88   | 0.83   | 2.06   | 3.68   | 1.93   | 1.68   | 6.59   | 0.81   | 0.61   |
| complex <b>b</b> $^e$ (pH*4.6)  |        |        |        |        |        |        |        |        |        |
| $\delta$                        | 147.59 | 124.94 | 139.84 | 141.73 | 131.91 | 113.96 | 163.54 | 131.18 | 127.45 |
| $\Delta\delta$                  | -2.00  | 0.23   | 2.06   | 3.13   | 1.75   | 1.82   | 7.25   | 0.69   | 0.61   |
| complex <b>c</b> $^f$ (pH* 6.8) |        |        |        |        |        |        |        |        |        |
| $\delta$                        | 151.46 | 125.31 | 139.58 | 142.42 | 132.02 | 113.47 | 164.04 | 127.47 | 127.31 |
| $\Delta\delta$                  | 1.34   | 0.64   | 2.89   | 2.83   | 2.11   | 1.75   | 6.90   | -2.57  | 0.56   |

$^a$   $\delta$  Values, in ppm, relative to  $\text{Me}_4\text{Si}$ , using *tert*-butyl alcohol ( $\delta_{\text{C}}$  31.2) as internal reference;  $J$  values in Hz.

$^b$  10 mmol  $\text{dm}^{-3}$  8-HQS solution.

$^c$  5:10 mmol  $\text{dm}^{-3}$  Mo(VI)–8-HQS solution.

$^d$  10:10 mmol  $\text{dm}^{-3}$  Mo(VI)–8-HQS solution.

$^e$  5:10 mmol  $\text{dm}^{-3}$  W (VI)–8-HQS solution.

$^f$  10:10 mmol  $\text{dm}^{-3}$  W (VI)–8-HQS solution.

Table S3.  $^{95}\text{Mo}$  NMR parameters  $^a$  for the Mo(VI)/8-HQS complexes (298 K)

|                                 | $\delta$ $^{95}\text{Mo}$ | $\Delta\nu_{1/2}/\text{Hz}$ |
|---------------------------------|---------------------------|-----------------------------|
| <b>Mo(VI)/8-HQS</b>             |                           |                             |
| complex <b>a</b> $^b$ (pH* 3.8) | 88                        | 600                         |
| complex <b>b</b> $^b$ (pH* 3.8) | 109                       | 940                         |
| complex <b>c</b> $^c$ (pH* 5.3) | 36                        | 410                         |

$^a$   $\delta$  values, in ppm, relative to external reference  $\text{Na}_2\text{MoO}_4$  2 mol  $\text{dm}^{-3}$ , pH\* dissolution (pH\* 9.0).

$^b$  5:10 mmol  $\text{dm}^{-3}$  Mo(VI)–8-HQS solution.

$^c$  10:10 mmol  $\text{dm}^{-3}$  Mo(VI)–8-HQS solution.

Table S4.  $^{183}\text{W}$  NMR parameters <sup>a</sup> for the W(VI)/8-HQS complexes (298 K)

|                                         | $\delta$ $^{183}\text{W}$ |
|-----------------------------------------|---------------------------|
| <b>W(VI)/8-HQS</b>                      |                           |
| complex <b>a</b> <sup>b</sup> (pH* 4.6) | 20.7                      |
| complex <b>b</b> <sup>b</sup> (pH* 4.6) | 63.3                      |
| complex <b>c</b> <sup>c</sup> (pH* 6.8) | -74.5                     |

*a*  $\delta$  values, in ppm, relative to external reference  $\text{Na}_2\text{WO}_4$  2 mol  $\text{dm}^{-3}$ , pH\* dissolution (pH\* 9.5).

*b* 5:10 mmol  $\text{dm}^{-3}$  W(VI)–8-HQS solution.

*c* 10:10 mmol  $\text{dm}^{-3}$  W(VI)–8-HQS solution.

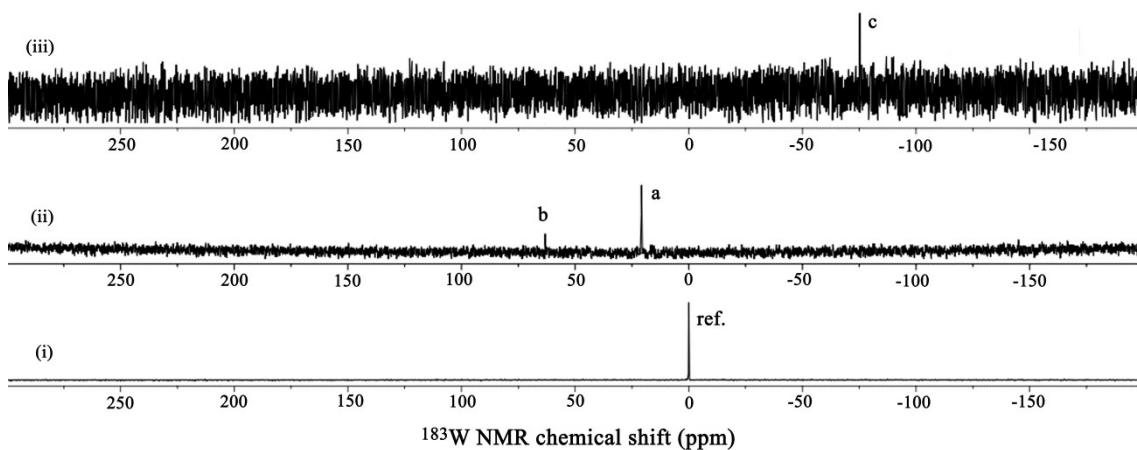

Figure S1.  $^{183}\text{W}$  NMR spectra (20.825 MHz) of  $\text{D}_2\text{O}$  solutions of (i)  $\text{Na}_2\text{WO}_4$  2 mol  $\text{dm}^{-3}$ , pH\* 9.8 (external reference), (ii) W(VI)/8-HQS 5:10 mmol  $\text{dm}^{-3}$ , pH\* 4.6, (iii) W(VI)/8-HQS 10:10 mmol  $\text{dm}^{-3}$ , pH\* 7.0, temp 298 K.
